# Supplementary material for: HOXC8 promotes breast tumorigenesis by transcriptionally facilitating cadherin-11 expression
Source: PubMed Central journal article supplement (PMC4058030; doi:10.18632/oncotarget.1841), 2014-03-22
Supplement: oncotarget-05-2596-s001.pdf [file oncotarget-05-2596-s001.pdf]

**Table S1. Oligonucleotides used in real-time PCR, cloning and knockdown experiments**

| <b>Primer Name</b>     | <b>Sequence (5' to 3')</b>                                    |
|------------------------|---------------------------------------------------------------|
| CDH11 promoter cloning |                                                               |
| -3000bp forward        | GACGGCCTGCTTTGTG TTCAGGTGTCAGAC                               |
| -2000bp forward        | TAAACCTGTCAGATCTCCTGAGACTTATTT                                |
| -1000bp forward        | GACCTTGGGCTGGTTGGTTGGATATACTGT                                |
| -100bp forward         | TCTGCGTGACGCGTCCGGGAGGCCACCCTC                                |
| Apa I reverse          | AAGGGCCCTTTTGGTTACGTGGTAGGCACAGGAGAATG                        |
| ChIP primers           |                                                               |
| CDH11 -796 forward     | ATCTTCCTCCTTGAATTGAC                                          |
| CDH11 -796 reverse     | AGATCCCAAGAAACCATTGA                                          |
| CDH11 -501 forward     | CTAAACTGAACCCCAGTGTG                                          |
| CDH11 -501 reverse     | GCCTGGTACATAGTAAGCAC                                          |
| CDH11 -196 forward     | AGCCCGTAGCTCCCACGTGATA                                        |
| CDH11 -196 reverse     | CCA ACTGTACGGTGGTCTTGCTGA                                     |
| RP II forward          | GCTAACTGGGGACGTGGGCA                                          |
| RP II reverse          | CAAAGGCATGGCTGTGGCAC                                          |
| Knockdown shRNA        |                                                               |
| Scrambled shRNA        | AAAACAACAAGATGAAGAGCACCAATTGGATCCAATTGG                       |
| HOXC8 shRNA1           | TGCTCTTCATCTTGTTG<br>AAAAGCAATATCCCGACTGTAAATCTTGGATCCAAGATTT |

|                     |                                                                                     |
|---------------------|-------------------------------------------------------------------------------------|
| HOXC8 shRNA2        | ACAGTCGGGATATTGC<br><br>AAAAGCCTCATGTTTCCATGGATGATTGGATCCAATCATCC<br>TGGAAACATGAGGC |
| mutagenesis         |                                                                                     |
| Forward 1           | GACCTTGGGCTGGTTGGTTGGATATACTGT                                                      |
| Reverse 1           | TGGATTAAGTGCAGGCCAAATCCCCAC                                                         |
| Forward 2           | CAGTTAATCCAACCTCTCTCTGCTTGCAGAAG                                                    |
| Reverse 2           | AAGGGCCCTTTTGGTTACGTGGTAGGCACAGGAGAATG                                              |
| Real-time PCR       |                                                                                     |
| Cadherin 11 forward | GCATCCCGCCCATGAGTA                                                                  |
| Cadherin 11 reverse | CGCACCCGCAGACTTTG                                                                   |

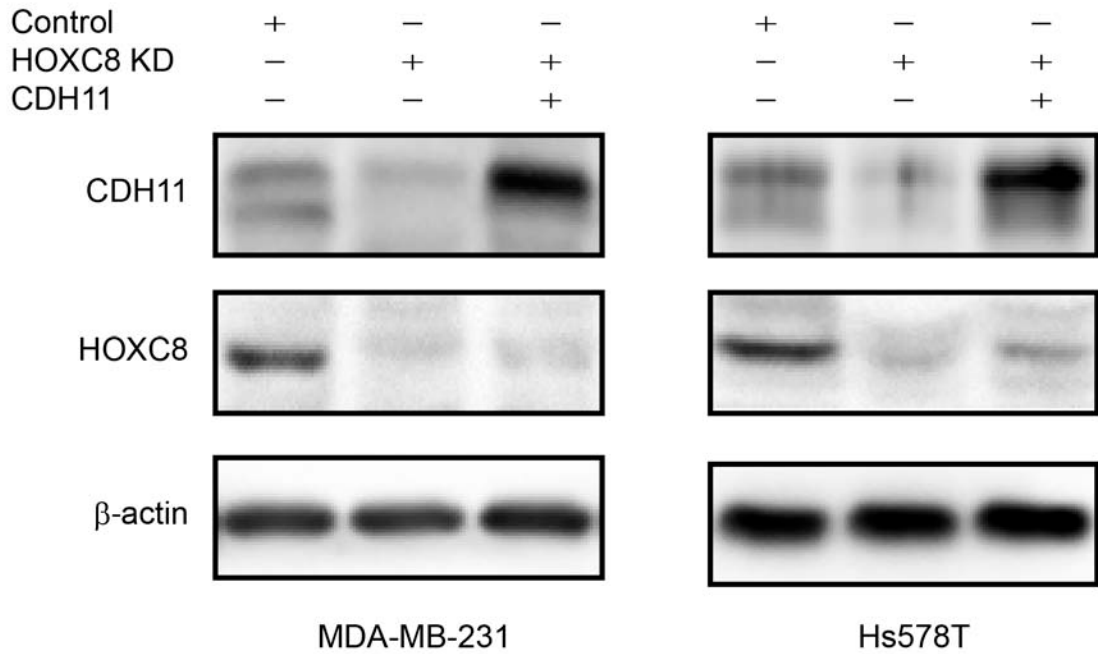

**Figure S1. Expression of HOXC8 and CDH11 in control, HOXC8-knockdown cells and knockdown cells with ectopic CDH11 expression.** Overnight culture cells were lysed for Western blot to detect HOXC8, CDH11 and  $\beta$ -actin with the respective antibodies.

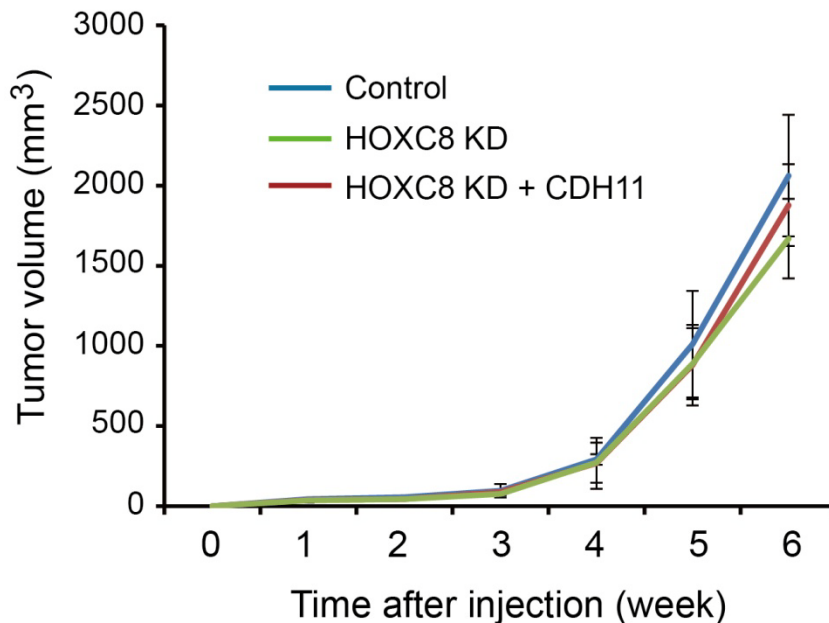

**Figure S2. *In vivo* tumor outgrowth of mice receiving control MDA-MB-231 cells, MDA-MB-231 cells lentivirally transduced with HOXC8 shRNA or HOXC8 shRNA plus CDH11 expression vector.** Cells ( $10^6$  cells/mouse) were subcutaneously injected at 4th mammary fat pad area of female athymic nude mice (4-6 weeks of age). Xenografts were externally measured in two dimensions using a caliper. Data are means  $\pm$  sem. n=10. Student-Newman-Keuls test were used to compare three groups. Conclusion: there was no statistically significant difference among control, HOXC8 KD and HOXC8 KD + CDH11 groups.
